# Supplementary material
Source: Springer Nature journal article supplement (https://www.springermedizin.de/resource/supplementary/13024_2014_544_MOESM1_ESM.pdf/9644364)
Supplement: MOESM1 [file 9644364]

# Supplemental Figure 1

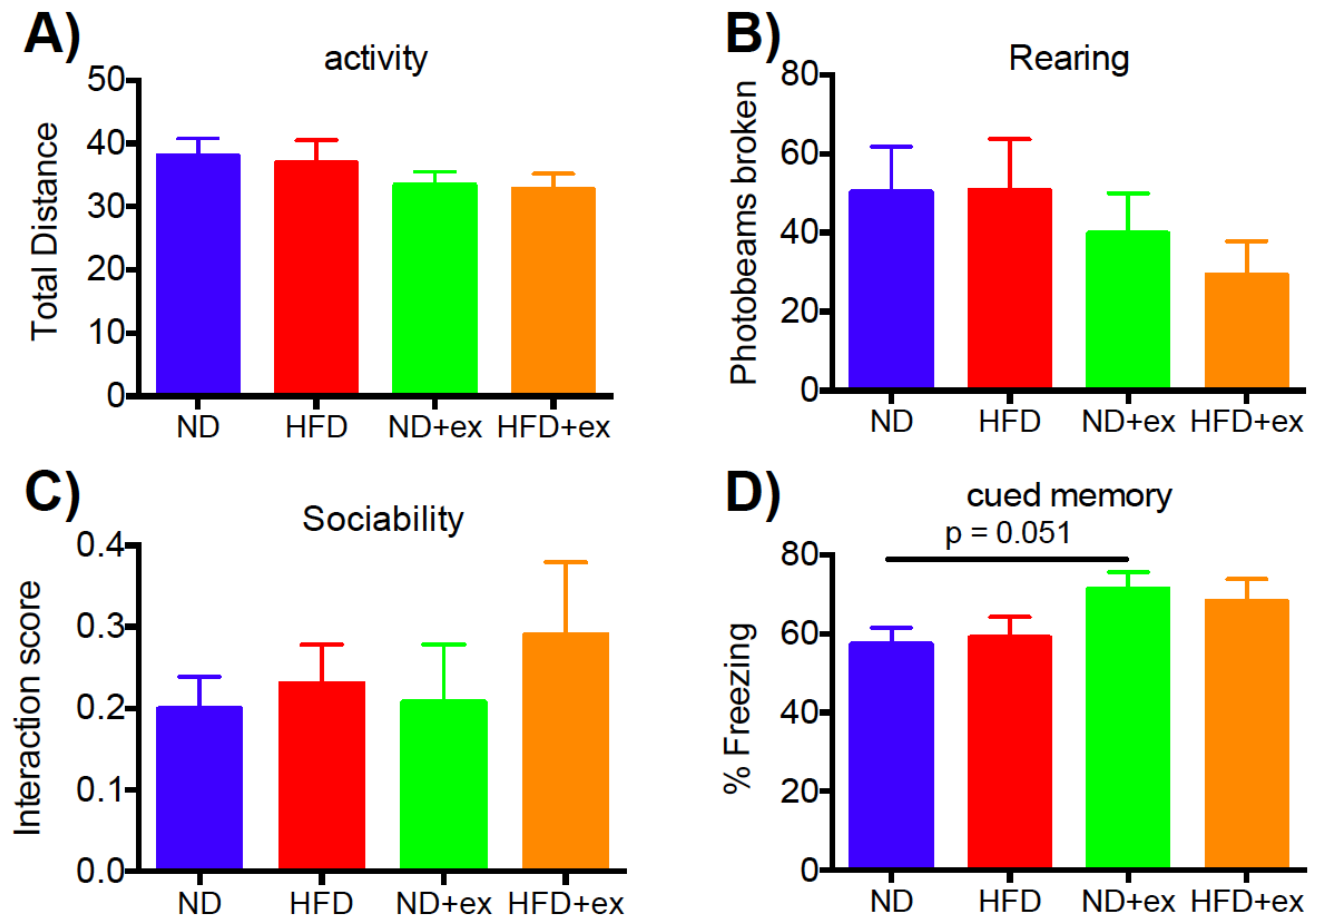

Figure S1. Impact of diet and exercise on other mouse behaviors. Neither HFD nor exercise altered total locomotor activity (A) or rearing (B) in the open field assay or in sociability (C) in the three chamber social test. As with the contextual memory, exercised mice had a trend toward increased cued memory (D,  $p = 0.051$ ) in the cued portion of the contextual fear conditioning assay.
